# Supplementary material for: Weathering of a Roman Mosaic—A Biological and Quantitative Study on In Vitro Colonization of Calcareous Tesserae by Phototrophic Microorganisms
Source: PLOS journal article supplement (doi:10.1371/journal.pone.0164487), 2016-10-26
Supplement: S6 (10.1371/journal.pone.0164487.s006) [file journal.pone.0164487.s006]

## S5 Fig

**Fractal dimension.** Fractal dimension (mean $\pm$ SD of three sampling points) relative to colonized areas obtained from confocal Z-stack images.

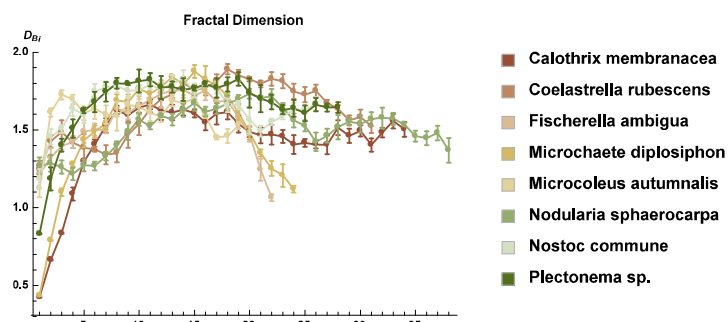

S5 Fig
